# Supplementary material for: The Anticancer Activity for the Bumetanide-Based Analogs via Targeting the Tumor-Associated Membrane-Bound Human Carbonic Anhydrase-IX Enzyme
Source: PubMed Central journal article supplement (PMC7558282; doi:10.3390/ph13090252), 2020-09-18
Supplement: pharmaceuticals-13-00252-s001.pdf [file pharmaceuticals-13-00252-s001.pdf]

Table S1: Data of the virtual docking simulations conducted for the bumetanide compounds against the human carbonic anhydrase isozyme-type IX

| Docked Ligand                     | MOE (S) <sup>a</sup><br>(Kcal/mol) | RMSD <sup>b</sup><br>(Å) | Ligand-target interaction descriptions <sup>c</sup><br>[Type of Interactions; Length (Å); Angle (°); Interacting Residues]                                                                                                                                                                                                                                                           |
|-----------------------------------|------------------------------------|--------------------------|--------------------------------------------------------------------------------------------------------------------------------------------------------------------------------------------------------------------------------------------------------------------------------------------------------------------------------------------------------------------------------------|
| Crystallized Ligand<br>(Redocked) | -2.1678                            | 2.07                     | 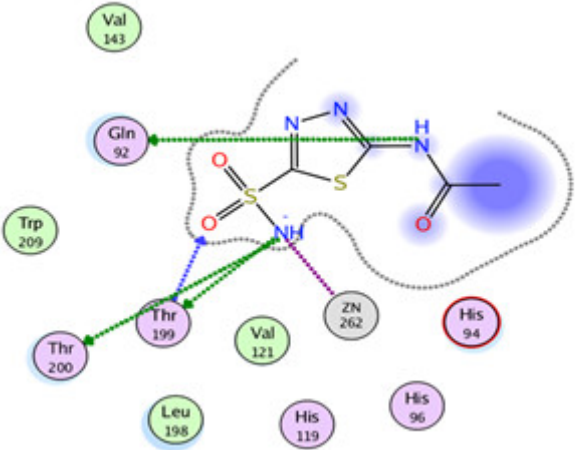 <p>Coordination ; 2.9 Å ; ZnII prosthetic group<br/> H-bonding ; 2.4 Å ; 110.7° ; Thr-200 (Side chain –OH)<br/> H-bonding ; 1.9 Å ; 140.5° ; Thr-199 (Side chain –OH)<br/> H-bonding ; 2.0 Å ; 146.6° ; Thr-199 (Side chain –OH)<br/> H-bonding ; 2.5 Å ; 120° ; Gln-92 (Side chain –C(O)NH–)</p> |
| Ligand 2                          | -5.2332                            | 1.99                     |  <p>Coordination ; 3.7 Å ; ZnII prosthetic group<br/> Coordination ; 3.2 Å ; ZnII prosthetic group<br/> H-bonding ; 2.1 Å ; 110.7° ; Thr-199 (Side chain –OH)<br/> H-bonding ; 2.2 Å ; 110.7° ; Thr-200 (Side chain –OH)<br/> Arene-Arene interaction ; 2.6 Å ; His-94</p>                       |

|                        |                |             |                                                                                                                                                                                                                                                                                                        |
|------------------------|----------------|-------------|--------------------------------------------------------------------------------------------------------------------------------------------------------------------------------------------------------------------------------------------------------------------------------------------------------|
| <p><b>Ligand 3</b></p> | <p>-5.0587</p> | <p>1.80</p> | 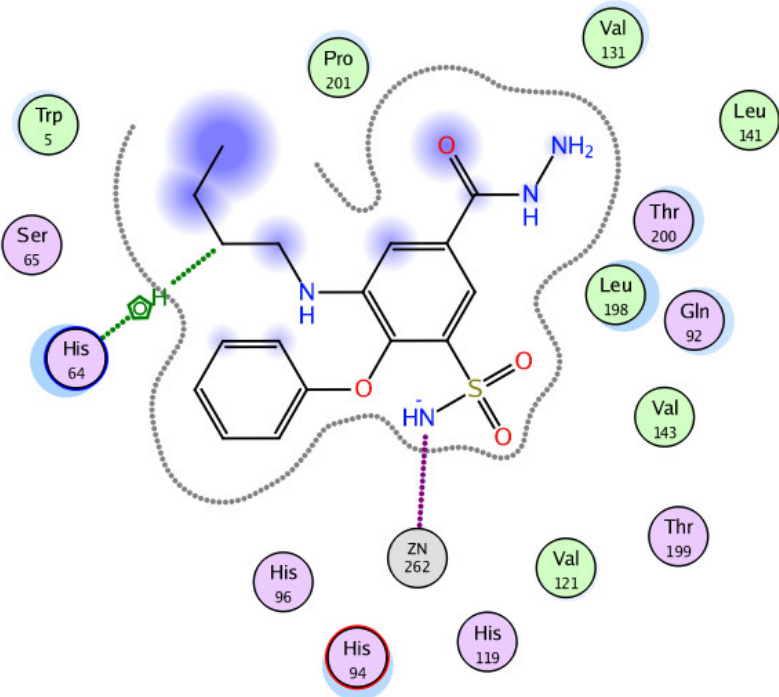 <p>Coordination ; 3.0 Å ; ZnII prosthetic group<br/>         Arene-Hydrogen interaction ; 3.7 Å ; His-94</p>                                                                                                        |
| <p><b>Ligand 4</b></p> | <p>-4.6697</p> | <p>3.09</p> |  <p>Hydrogen bonding ; 2.5 Å ; 113.1° ; Asn-62 (Side chain -NHH)<br/>         Hydrogen bonding ; 1.9 Å ; 160.8° ; Gln-92 (Side chain -NH<sub>2</sub>)<br/>         Arene-Hydrogen interaction ; 3.2 Å ; His-94</p> |

|           |         |      |                                                                                                                                                                                                                                                                                            |
|-----------|---------|------|--------------------------------------------------------------------------------------------------------------------------------------------------------------------------------------------------------------------------------------------------------------------------------------------|
| Ligand 5  | -5.1975 | 2.36 | 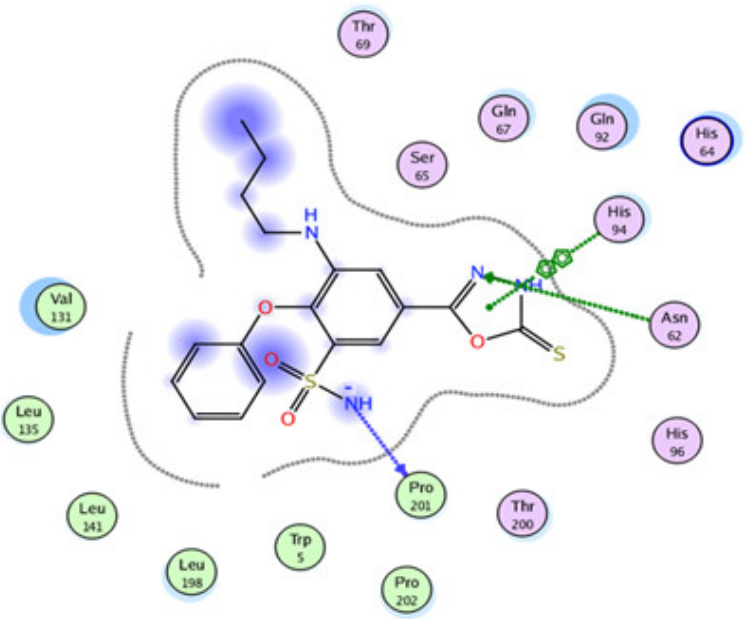 <p>Hydrogen bonding ; 2.1 Å ; 135.2° ; Asn-62 (Side chain –NHH)</p> <p>Hydrogen bonding ; 2.3 Å ; 148.9° ; Pro-201 (Main chain –C(O)NH–)</p> <p>Arene-Arene interaction ; 3.2 Å ; His-94</p>            |
| Ligand 6a | -5.0228 | 1.64 |  <p>Hydrogen bonding ; 2.3 Å ; 159.8° ; His-4 (Side chain =N)</p> <p>Hydrogen bonding ; 2.2 Å ; 134.2° ; His-64 (Side chain –NH)</p> <p>Hydrogen bonding ; 2.4 Å ; 131.3° ; Trp-5 (Side chain –NH)</p> |

|                         |                |             |                                                                                                                                                                                                                                                                                      |
|-------------------------|----------------|-------------|--------------------------------------------------------------------------------------------------------------------------------------------------------------------------------------------------------------------------------------------------------------------------------------|
| <p><b>Ligand 6b</b></p> | <p>-4.8280</p> | <p>2.01</p> | 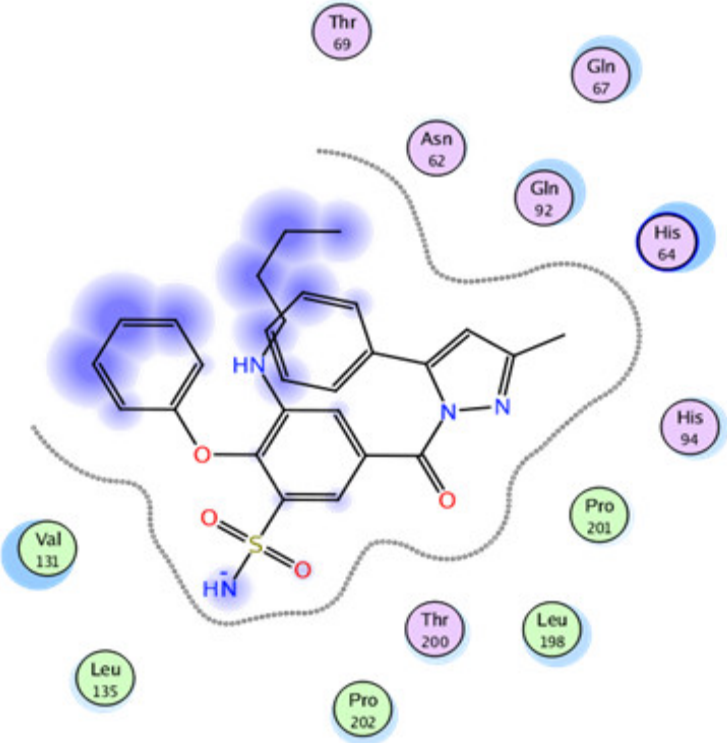                                                                                                                                                                                                   |
| <p><b>Ligand 7a</b></p> | <p>-6.2632</p> | <p>1.56</p> |  <p>Hydrogen bonding; 2.7 Å; 107.1°; Asn-62 (Side chain –NHH)</p> <p>Hydrogen bonding; 2.4 Å; 108.2°; His-64 (Side chain –NH)</p> <p>Hydrogen bonding; 3.2 Å; 132.7°; Trp-5 (Side chain –NH)</p> |

|                         |                |             |                                                                                                                                                         |
|-------------------------|----------------|-------------|---------------------------------------------------------------------------------------------------------------------------------------------------------|
| <p><b>Ligand 7b</b></p> | <p>-5.2799</p> | <p>3.37</p> | 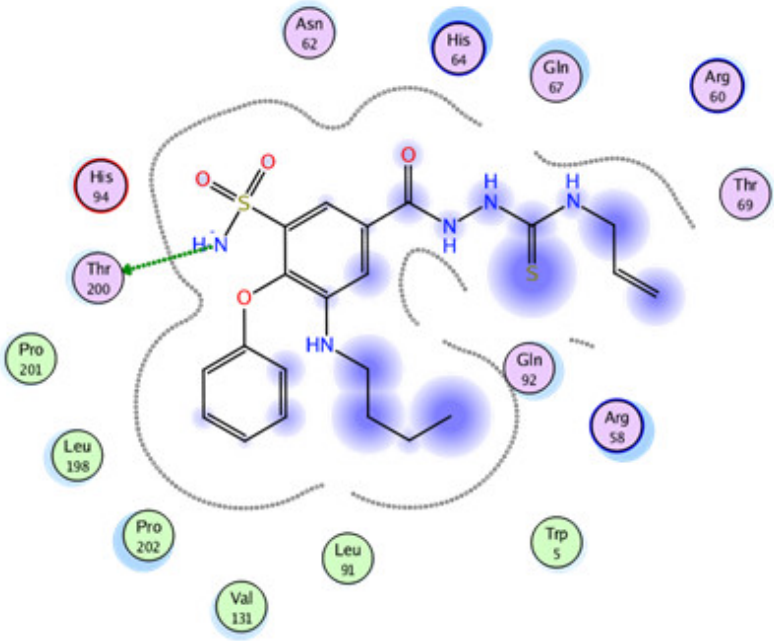 <p>Hydrogen bonding ; 2.5 Å ; 137.4° ; Thr-200 (Side chain –OH)</p>  |
| <p><b>Ligand 7c</b></p> | <p>-5.8080</p> | <p>1.81</p> |  <p>Hydrogen bonding ; 2.3 Å ; 119.3° ; His-64 (Side chain –NH)</p> |

|                         |                |             |                                                                                                                                                           |
|-------------------------|----------------|-------------|-----------------------------------------------------------------------------------------------------------------------------------------------------------|
| <p><b>Ligand 8a</b></p> | <p>-5.4913</p> | <p>3.08</p> | 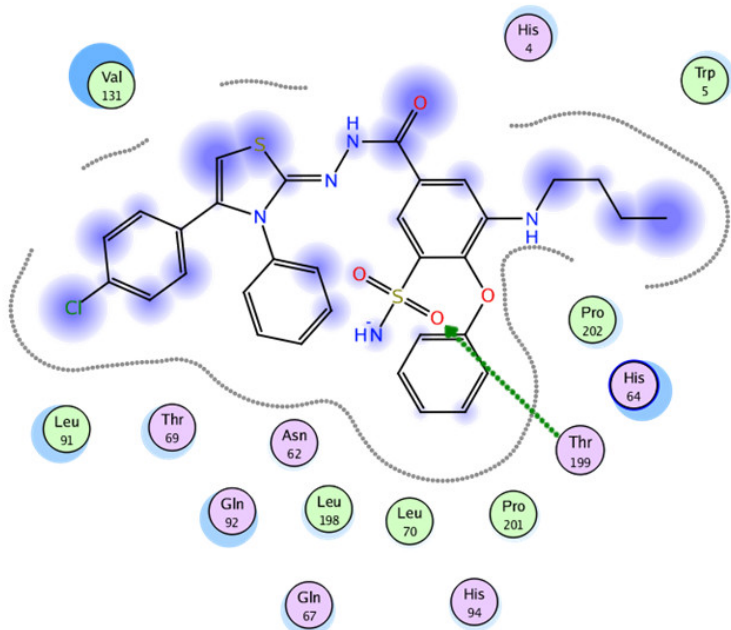 <p>Hydrogen bonding ; 2.5 Å ; 139.4° ; Thr-199 (Side chain –NH)</p>    |
| <p><b>Ligand 8b</b></p> | <p>-6.4351</p> | <p>2.91</p> |  <p>Arene-Hydrogen interaction ; 3.2 Å ; Leu-91 (Side chain –CHH–)</p> |

|                         |                |             |                                                                                                                                                                                                                                                                                           |
|-------------------------|----------------|-------------|-------------------------------------------------------------------------------------------------------------------------------------------------------------------------------------------------------------------------------------------------------------------------------------------|
| <p><b>Ligand 8c</b></p> | <p>-4.8966</p> | <p>3.16</p> | 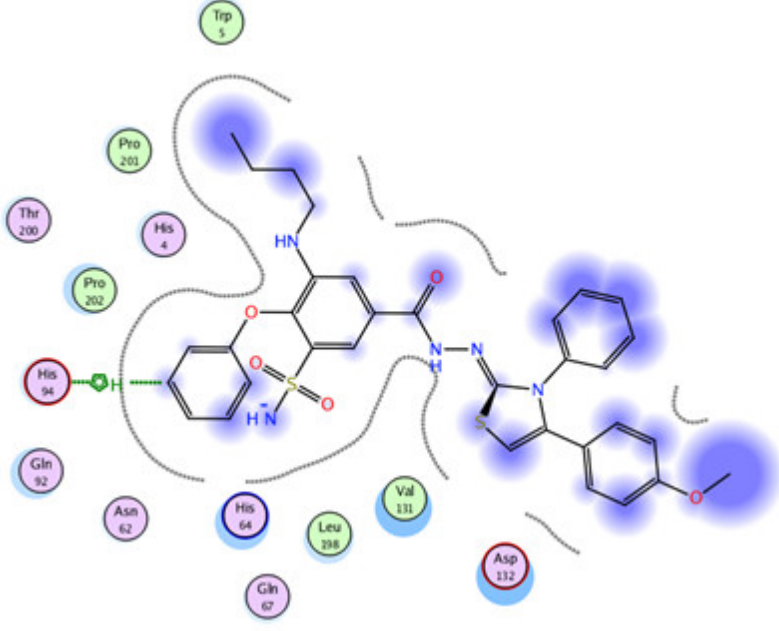 <p>Arene-Hydrogen interaction ; 4.4 Å ; His-94</p>                                                                                                                                                     |
| <p><b>Ligand 8d</b></p> | <p>-6.2110</p> | <p>2.54</p> |  <p>Hydrogen bonding ; 2.9 Å ; 129.4° ; His-64 (Side chain -NH)<br/> Hydrogen bonding ; 3.1 Å ; 144.5° ; Asn-62 (Side chain -NH)<br/> Hydrogen bonding ; 3.2 Å ; 122.5° ; Thr-199 (Side chain -OH)</p> |

|                         |                |             |                                                                                                                                                                                                             |
|-------------------------|----------------|-------------|-------------------------------------------------------------------------------------------------------------------------------------------------------------------------------------------------------------|
| <p><b>Ligand 8e</b></p> | <p>-5.7674</p> | <p>2.77</p> | 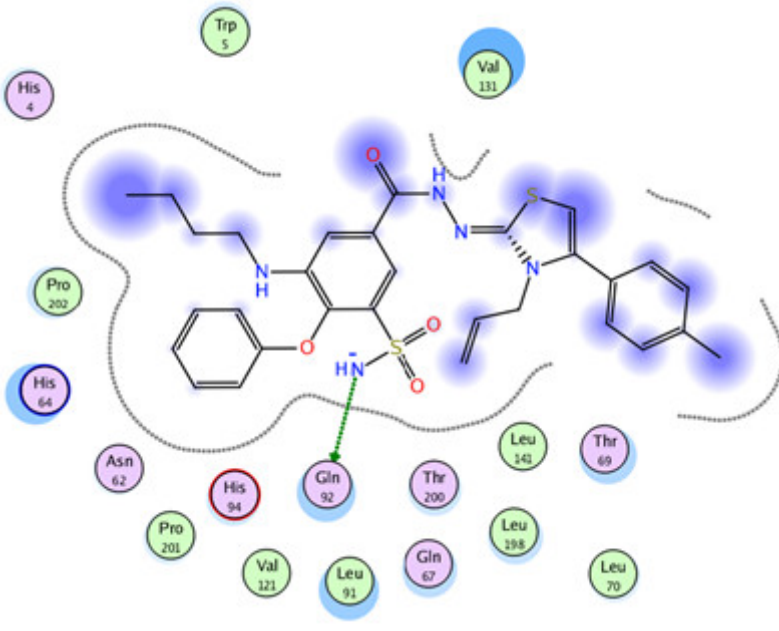 <p>Hydrogen bonding ; 2.3 Å ; 146.5° ; Gln-92 (Side chain –C(O)NH–)</p>                                                  |
| <p><b>Ligand 8f</b></p> | <p>-5.1837</p> | <p>1.70</p> |  <p>Hydrogen bonding ; 2.2 Å ; 152.6° ; Trp-5 (Side chain –NH)<br/>         Arene-Arene interaction ; 3.7 Å ; His-64</p> |



|           |         |      |                                                                                                                                                           |
|-----------|---------|------|-----------------------------------------------------------------------------------------------------------------------------------------------------------|
| Ligand 8g | -6.2308 | 2.50 | 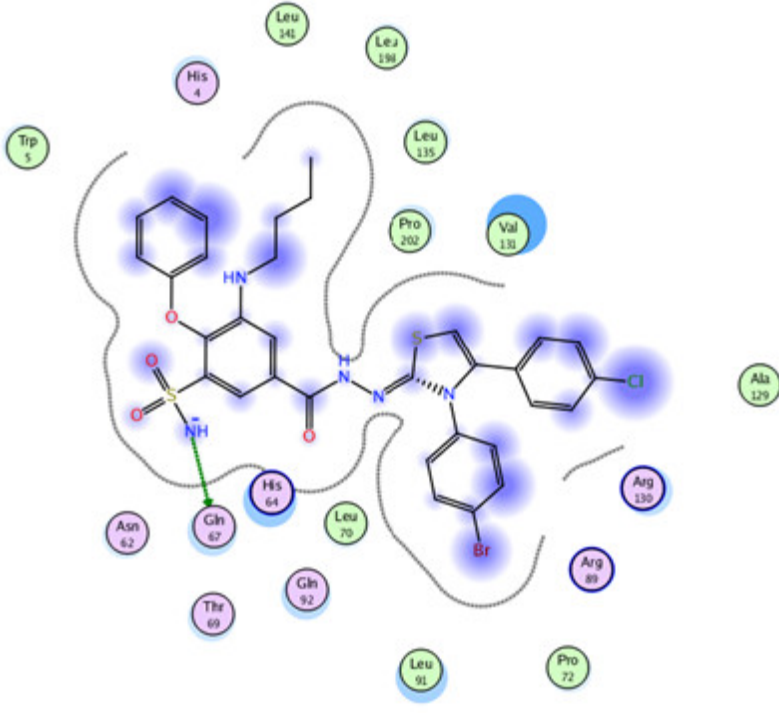 <p>Hydrogen bonding; 2.1 Å; 153.0°; Gln-67 (Side chain -C(O)NH-)</p>   |
| Ligand 8h | -5.4212 | 1.69 |  <p>Hydrogen bonding; 2.1 Å; 144.0°; Gln-92 (Side chain -C(O)NH-)</p> |

|                         |                |             |                                                                                                                                                                                                                                                                                                                     |
|-------------------------|----------------|-------------|---------------------------------------------------------------------------------------------------------------------------------------------------------------------------------------------------------------------------------------------------------------------------------------------------------------------|
| <p><b>Ligand 8i</b></p> | <p>-4.9819</p> | <p>1.05</p> | 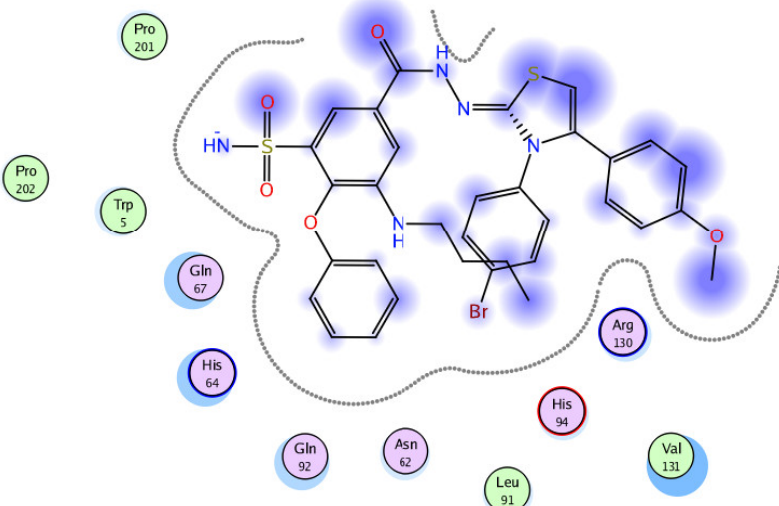                                                                                                                                                                                                                                  |
| <p><b>Ligand 9a</b></p> | <p>-4.3762</p> | <p>2.39</p> |  <p>Hydrogen bonding ; 2.6 Å ; 141.0° ; Gln-67 (Side chain –C(O)NH<sub>2</sub>)<br/> Hydrogen bonding ; 2.9 Å ; 122.9° ; Gln-67 (Side chain –C(O)NHH)<br/> Hydrogen bonding ; 3.0 Å ; 161.0° ; Pro-201 (Main chain –C(O)NH–)</p> |

|                         |                |             |                                                                                                                                                                                                                                                                                                                                                                                                                                                               |
|-------------------------|----------------|-------------|---------------------------------------------------------------------------------------------------------------------------------------------------------------------------------------------------------------------------------------------------------------------------------------------------------------------------------------------------------------------------------------------------------------------------------------------------------------|
| <p><b>Ligand 9b</b></p> | <p>-6.4845</p> | <p>1.94</p> | 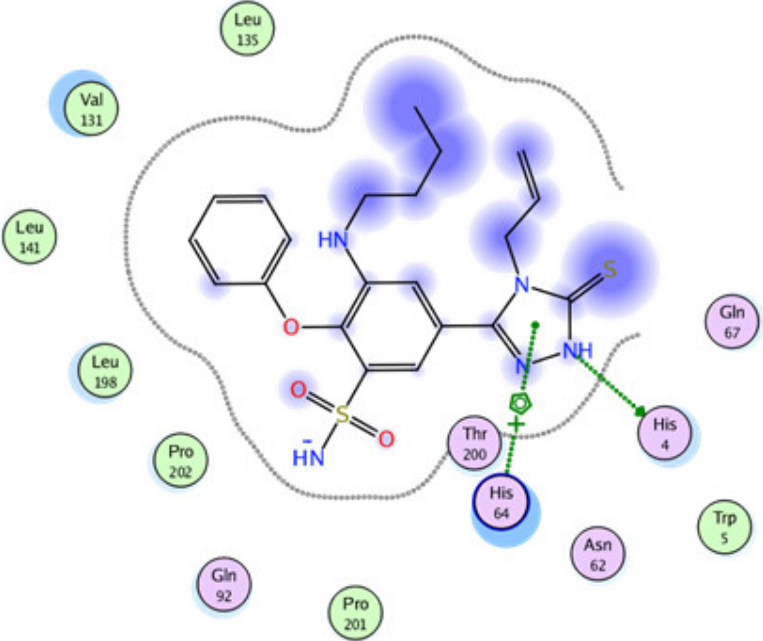 <p>Hydrogen bonding ; 2.1 Å ; 147.7° ; His-4 (Side chain =N-)<br/>         Arene-Cation interaction ; 3.5 Å ; His-64 (Side chain -N<sup>+</sup>H<sub>2</sub>-)</p>                                                                                                                                                                                                         |
| <p><b>Ligand 9c</b></p> | <p>-5.8355</p> | <p>1.63</p> |  <p>Hydrogen bonding ; 2.7 Å ; 129.6° ; Thr-200 (Side chain -OH)<br/>         Hydrogen bonding ; 3.0 Å ; 106.9° ; Asn-62 (Side chain -NH)<br/>         Hydrogen bonding ; 2.7 Å ; 124.5° ; Trp-5 (Side chain -NH)<br/>         Arene-Hydrogen interaction ; 3.2 Å ; Trp-5 (Side chain -NH)<br/>         Arene-Hydrogen interaction ; 3.0 Å ; His-64 (Side chain =CH-)</p> |

<sup>a</sup> MOE (S); Docking scores utilizing the scoring function assigned for the best-ranking poses which have been selected relying on the visual examination and after refinement through the rescoring function of the GBVI/WSA dG.

<sup>b</sup> RMSD; root mean square deviation of the best-ranking pose as compared to the crystal.

<sup>c</sup> The Legend for the predicted Ligand-enzyme residues interactions as follows:

|                                                                                                     |                                                                                                      |                                                                                                     |                                                                                                  |
|-----------------------------------------------------------------------------------------------------|------------------------------------------------------------------------------------------------------|-----------------------------------------------------------------------------------------------------|--------------------------------------------------------------------------------------------------|
|  polar             |  sidechain acceptor |  solvent residue   |  nonconserved |
|  acidic            |  sidechain donor    |  metal complex     |  nonpresent   |
|  basic             |  backbone acceptor  |  solvent contact   |  inconsistent |
|  greasy            |  backbone donor     |  metal/ion contact |  arene-arene  |
|  proximity contour |  ligand exposure    |  receptor exposure |  arene-H      |
|                                                                                                     |                                                                                                      |                                                                                                     |  arene-cation |
